# Supplementary material
Source: publisher site journal article supplement (https://www.degruyterbrill.com/publication/isbn/9783110978698/downloadAsset/9783110978698_Inhaltsverzeichnis.pdf)
Supplement: Supplementary file 1 [file 9783110978698_Inhaltsverzeichnis.pdf]

## Inhaltsverzeichnis

| Nr.                                                                                                                                                                    | Seite |
|------------------------------------------------------------------------------------------------------------------------------------------------------------------------|-------|
| 1. Europäische Kommission für Menschenrechte                                                                                                                           |       |
| 1 Einschränkung der Religionsfreiheit im Strafvollzug. Teilbeschluss vom 15.2.1965 (No. 1753/63 [X. ./ Österreich]) . . . . .                                          | 3     |
| 2 Haftpflichtversicherung. Beschluss vom 31.5.1967 (No. 2988/66 [X. ./ Niederlande]) . . . . .                                                                         | 5     |
| 3 Recht auf Ehe nach Maßgabe der Vorschriften weltlichen Rechts. Beschluss vom 18.12.1974 (No. 6167/73 [X. ./ Deutschland]) . . . . .                                  | 8     |
| 4 Einschränkungen der Religions-, Korrespondenz- und Meinungsfreiheit im Strafvollzug. Beschluss vom 20.12.1974 (No. 5442/72 [X. ./ Vereinigtes Königreich]) . . . . . | 9     |
| 5 Konflikt eines Geistlichen mit der Staatskirche in seelsorglicher Angelegenheit. Beschluss vom 8.3.1976 (No. 7374/76 [X. ./ Dänemark]) . . . . .                     | 12    |
| 6 Helmpflicht für Motorradfahrer u. Religionsfreiheit von Sikhs. Beschluss vom 12.7.1978 (No. 7992/77 [X. ./ Vereinigtes Königreich]) . . .                            | 14    |
| 7 Schutzbereich der Religionsfreiheit. Beschluss vom 27.2.1979 (No. 7865/77 [Company X. ./ Schweiz]) . . . . .                                                         | 15    |
| 8 Meinungsfreiheit des Lehrers. Beschluss vom 1.3.1979 (No. 8010/77 [X. ./ Vereinigtes Königreich]) . . . . .                                                          | 16    |
| 9 Kommerzielle Werbung einer Religionsgemeinschaft. Beschluss vom 5.5.1979 (No. 7805/77 [Church of Scientology u.a. ./ Schweden]) . . . . .                            | 18    |
| 10 Beeinträchtigung der Religionsfreiheit und Rechtsschutzgarantie. Beschluss vom 14.7.1980 (No. 8282/78 [Church of Scientology u.a. ./ Schweden]) . . . . .           | 23    |
| 11 Bestattung auf dem eigenen Grundstück. Beschluss vom 10.3.1981 (No. 8741/79 [X. ./ Deutschland]) . . . . .                                                          | 26    |
| 12 Freistellung eines Lehrer für das muslimische Freitagsgebet. Beschluss vom 12.3.1981 (No. 8160/78 [X. ./ Vereinigtes Königreich]) . . .                             | 29    |
| 13 Verbot einer religiösen Vereinigung. Beschluss vom 15.10.1981 (No. 8652/79 [X. ./ Österreich]) . . . . .                                                            | 41    |

|    |                                                                                                                                                                            |     |
|----|----------------------------------------------------------------------------------------------------------------------------------------------------------------------------|-----|
| 14 | Elterliches Züchtigungsrecht unter Berufung auf die Bibel. Beschluss vom 13.5.1982 (No. 8811/79 [X. ./ Schweden]) .....                                                    | 44  |
| 15 | Steuerverweigerung aus religiösen Gründen. Beschluss vom 15.12.1983 (No. 10358/83 [C. ./ Vereinigtes Königreich]) .....                                                    | 56  |
| 16 | Erhebung von Kirchenbeiträgen. Beschluss vom 14.5.1984 (No. 9781/82 [E.U.G.R. ./ Österreich]) .....                                                                        | 62  |
| 17 | Pflichtmitgliedschaft in Pensionskasse. Beschluss vom 5.7.1984 (No. 10678/83 [V. ./ Niederlande]) .....                                                                    | 66  |
| 18 | Erhebung von Kirchensteuer. Beschluss vom 4.12.1984 (No. 10616/83 [Gottesmann ./ Schweiz]) .....                                                                           | 67  |
| 19 | Entlassung eines Geistlichen aus staatsbehödl. Funktionen. Beschluss vom 8.3.1985 (No. 11045/84 [Knudsen ./ Norwegen]) .....                                               | 70  |
| 20 | Einschränkung der Meinungsfreiheit im kirchlichen Dienstverhältnis. Beschluss vom 6.9.1989 (No. 12242/86 [Rommelfanger ./ Deutschland]) .....                              | 80  |
| 21 | Verweigerung des Gewerkschaftsbeitritts aus Glaubensgründen. Beschluss vom 16.5.1990 (No. 11518/85 [Chauhan ./ Vereinigtes Königreich]) .....                              | 87  |
| 22 | Individualbeschwerde gegen Autor und Verleger des Buches „Satani-sche Verse“. Beschluss vom 5.3.1991 (No. 17439/90 [Choudhury ./ Vereinigtes Königreich]) .....            | 97  |
| 23 | Kumulative Befreiung vom Wahlpflichtfach Religion/Ethik an öffent-lichen Schulen. Beschluss vom 9.9.1992 (No. 17568/90 [Sluis ./ Bel-gien]) .....                          | 100 |
| 24 | Teilnahme an einem Lehrgang des Zivilschutzes. Beschluss vom 8.1.1993 (No. 17003/90, 18206/91 [Fadini ./ Schweiz]) .....                                                   | 108 |
| 25 | Passbild mit Kopftuch. Beschluss vom 3.5.1993 (No. 18783/91 [Bulut ./ Türkei]) .....                                                                                       | 110 |
| 26 | Befreiung vom Religionsunterricht/Ethikunterricht an öffentlichen Schulen. Beschluss vom 8.9.1993 (No. 17187/90 [Bernard u.a. ./ Lu-xemburg]) .....                        | 115 |
| 27 | Nutzungsbeschränkungen für eine von einer Religionsgemeinschaft genutzte Liegenschaft. Beschluss vom 8.3.1994 (No. 20490/92 [ISKCON u.a. ./ Vereinigtes Königreich]) ..... | 123 |
| 28 | Rentenrechtliche Berücksichtigung von Vordienstzeiten in einem relig. Orden. Beschluss vom 17.1.1995 (No. 24389/94 [Temprano Go-mez ./ Spanien]) .....                     | 138 |

|                                                    |                                                                                                                                                                                                       |     |
|----------------------------------------------------|-------------------------------------------------------------------------------------------------------------------------------------------------------------------------------------------------------|-----|
| 29                                                 | Freigabe eines nichtehelichen Kindes zur Adoption. Beschluss vom 22.2.1995 (No. 24848/94 [Bellis ./ Griechenland]) . . . . .                                                                          | 141 |
| 30                                                 | Werbe- und Demonstrationsverbot für Abtreibungsgegner. Beschluss vom 22.2.1995 (No. 22838/93 [v.d. Dungen ./ Niederlande]) . . . . .                                                                  | 143 |
| 31                                                 | Militärischer Gehorsam und Religionsfreiheit. Beschluss vom 4.9.1996 (No. 30479/96 [Hernandez Sanchez ./ Spanien]) . . . . .                                                                          | 148 |
| 32                                                 | Behördliche Warnung vor Religionsgemeinschaft. Beschluss vom 27.11.1996 (No. 29745/96 [Universelles Leben e.V. ./ Deutschland]) . .                                                                   | 151 |
| 33                                                 | Arbeitszeitregelungen und Religionsfreiheit. Beschluss vom 3.12.1996 (No. 24949/94 [Konttinen ./ Finnland]) . . . . .                                                                                 | 155 |
| 34                                                 | Verletzung religiöser Empfindungen durch Presseorgan. Beschluss vom 18.4.1997 (No. 33490/96, 34055/96 [Dubowska u.a. ./ Polen]) . . . .                                                               | 163 |
| 35                                                 | Betroffenheit durch Warnung vor Scientology in Schulen. Beschluss vom 4.3.1998 (No. 36283/97 [Keller ./ Deutschland]) . . . . .                                                                       | 169 |
| 36                                                 | Steuervergünstigung für Aktivitäten einer religiösen Vereinigung. Beschluss vom 16.4.1998 (No. 30260/96 [Sivananda de Yoga Vedanta ./ Frankreich]) . . . . .                                          | 174 |
| <br>2. Europäischer Gerichtshof für Menschenrechte |                                                                                                                                                                                                       |     |
| 37                                                 | Elterliches Erziehungsrecht u. öffentl. Schule (Sexualkundeunterricht). Urteil vom 7.12.1976 (No. 5095/71, 5920/72, 5926/72 [Kjeldsen u.a. ./ Dänemark]) . . . . .                                    | 181 |
| 38                                                 | Straftatbestand der Glaubensabwerbung (Proselytismus) durch Zeugen Jehovas zum Nachteil der Griechisch-Orthodoxen Kirche. Urteil vom 25.5.1993 (No. 14307/88 [Kokkinakis ./ Griechenland]) . . . . .  | 202 |
| 39                                                 | Übertragung des elterlichen Sorgerechts auf Angehörige der Zeugen Jehovas. Urteil vom 23.6.1993 (No. 15/1992/360/434 [Hoffmann ./ Österreich]) . . . . .                                              | 232 |
| 40                                                 | Beschlagnahme und Einziehung eines als blasphemisch beurteilten Films. Urteil vom 20.9.1994 (No. 11/1993/406/485 [Otto-Preminger-Institut f. audiovisuelle Mediengestaltung ./ Österreich]) . . . . . | 248 |
| 41                                                 | Genehmigungsbedürftigkeit einer Stätte öffentlicher Religionsausübung. Urteil vom 26.9.1996 (No. 59/1995/565/651 [Manoussakis u.a. ./ Griechenland]) . . . . .                                        | 263 |
| 42                                                 | Verletzung religiöser Gefühle durch einen Video-Film. Urteil vom 25.11.1996 (No. 19/1995/525/611 [Wingrove ./ Vereinigtes Königreich]) . . . . .                                                      | 278 |

|    |                                                                                                                                                                                                         |     |
|----|---------------------------------------------------------------------------------------------------------------------------------------------------------------------------------------------------------|-----|
| 43 | Schülerparade am Nationalfeiertag. Urteil vom 18.12.1996 (No. 74/1995/580/666 [Valsamis ./ Griechenland]). . . . .                                                                                      | 301 |
| 44 | Disziplinarische Maßnahme gegen einen Militärriechter wegen aktiver Mitgliedschaft in einer muslimisch-fundamentalistischen Sekte. Urteil vom 1.7.1997 (No. 61/1996/680/870 [Kalaç ./ Türkei]). . . . . | 312 |
| 45 | Personalstatus einer Kirchengemeinde. Urteil vom 16.12.1997 (No. 143/1996/762/963 [Kath. Kirche von Canea ./ Griechenland]). . . .                                                                      | 319 |
| 46 | Religiöse Abwerbung (Proselytismus) im Militärdienst. Urteil vom 24.2.1998 (No. 140/1996/759/958-960 [Larissis u.a. ./ Griechenland]). .                                                                | 333 |
| 47 | Religiöser Abgeordneteneid. Urteil vom 18.2.1999 (No. 24645/94 [Buscarini u.a. ./ San Marino]). . . . .                                                                                                 | 356 |
| 48 | Unterrichtsbefreiung für Siebenten-Tags-Adventisten am Sonnabend. Beschluss vom 27.4.1999 (No. 44888/98 [Martins Casimiro u.a. ./ Luxemburg]). . . . .                                                  | 362 |
| 49 | Zuverlässigkeit für privaten Sicherheitsdienst. Beschluss vom 14.10.1999 (No. 40130/98 [C.R. ./ Schweiz]). . . . .                                                                                      | 366 |
| 50 | Freiheitsentzug zwecks Herauslösung aus Sekte. Urteil vom 14.10.1999 (No. 37680/97 [Riera Blume ./ Spanien]). . . . .                                                                                   | 376 |
| 51 | Strafrechtl. Eingriff bei internem Konflikt einer Religionsgemeinschaft. Urteil vom 14.12.1999 (No. 38178/99 [Serif ./ Griechenland]). .                                                                | 385 |
| 52 | Überprüfung kirchengerichtlicher Entscheidungen im staatlichen Rechtsweg. Beschluss vom 23.3.2000 (No. 47021/99 [Kohn ./ Deutschland]). . . . .                                                         | 397 |
| 53 | Berufszugang u. Religionsfreiheit. Urteil vom 6.4.2000 (No. 34369/97 [Thlimmenos ./ Griechenland]). . . . .                                                                                             | 402 |
| 54 | Elterliches Erziehungsrecht u. öffentl. Schule (Sexualkundeunterricht). Beschluss vom 25.5.2000 (No. 51188/99 [Jiménez u.a. ./ Spanien]). . . . .                                                       | 412 |
| 55 | Rituelles Schlachten (Schächten). Urteil vom 27.6.2000 (No. 27417/95 [Cha'are Shalom ./ Frankreich]). . . . .                                                                                           | 418 |
| 56 | Eigene Angelegenheiten einer Religionsgemeinschaft. Urteil vom 26.10.2000 (No. 30985/96 [Hassan u.a. ./ Bulgarien]). . . . .                                                                            | 444 |
| 57 | Verfügungsfreiheit über Grundvermögen einer röm.-kath. Ordensgemeinschaft in der Türkei. Beschluss vom 14.12.2000 (No. 26308/95 [Institut de prêtres français u.a. ./ Türkei]). . . . .                 | 468 |

|                                 |                                                                                                                                                                                       |     |
|---------------------------------|---------------------------------------------------------------------------------------------------------------------------------------------------------------------------------------|-----|
| 58                              | Religiöse Überzeugung iSv Art. 9 EMRK. Beschluss vom 18.1.2001 (No. 41615/98 [Zaoui u.a. ./ Schweiz]) . . . . .                                                                       | 471 |
| 59                              | Rechtsweg für Streitigkeiten aus kirchl. Dienstverhältnis. Beschluss vom 30.1.2001 (No. 40224/98 [Dudova u.a. ./ Tschechische Republik]) . . . . .                                    | 476 |
| 60                              | Kopftuchverbot für Grundschullehrerin. Beschluss vom 15.2.2001 (No. 42393/98 [Dhalab ./ Schweiz]) . . . . .                                                                           | 485 |
| 61                              | Parlamentarische Äußerungen über Sekten. Urteil vom 27.2.2001 (No. 26958/95 [Jerusalem ./ Österreich]) . . . . .                                                                      | 500 |
| 62                              | Gleichbehandlung von Steuerpflichtigen unterschiedlicher Religionszugehörigkeit. Beschluss vom 14.6.2001 (No. 53072/99 [Alujer ./ Spanien]) . . . . .                                 | 509 |
| 63                              | Religion/Ethik im Schulzeugnisformular. Beschluss vom 26.6.2001 (No. 40319/98 [Saniewski ./ Polen]) . . . . .                                                                         | 517 |
| 64                              | Genehmigung für Anlage einer Kapelle u. eines Friedhofs. Beschluss vom 10.7.2001 (No. 41754/98 [Johannische Kirche u.a. ./ Deutschland]) . . . . .                                    | 523 |
| 65                              | Ausschluss von Freimaurern von öffentl. Ämtern etc. Urteil vom 2.8.2001 (No. 35972/97 [Grande Oriente d'Italia di Palazzo Giustiniani ./ Italien]) . . . . .                          | 527 |
| 66                              | Kirchensteuer von Nichtmitgliedern. Beschluss vom 28.8.2001 (No. 36846/97 [Lundberg ./ Schweden]) . . . . .                                                                           | 536 |
| 67                              | Befreiung vom Ethikunterricht. Beschluss vom 11.9.2001 (No. 26328/95 [Erdem ./ Türkei]) . . . . .                                                                                     | 543 |
| 68                              | Abgabe empfangnisverhütender Präparate durch Apotheker. Beschluss vom 2.10.2001 (No. 49853/99 ([Pichon u.a. ./ Frankreich] . . . . .                                                  | 548 |
| 69                              | Staatl. Überwachung von Sekten. Beschluss vom 6.11.2001 No. 53430/99 [Fédération Chrétienne des Témoins de Jéhovah de France ./ Frankreich]) . . . . .                                | 552 |
| 70                              | Staatl. Anerkennung einer Religionsgemeinschaft. Urteil vom 13.12.2001 (No. 45701/99 [Metropolitan Church of Bessarabia u.a. ./ Moldavien]) . . . . .                                 | 565 |
| <br>3. Europäischer Gerichtshof |                                                                                                                                                                                       |     |
| 71                              | Beschränkung der Freizügigkeit für Scientology-Mitglied innerhalb der Europäischen Union. Urteil vom 4.12.1974 (Rs. 41/74 [van Duyn ./ Home Office/Vereinigtes Königreich]) . . . . . | 593 |

|    |                                                                                                                                                                                           |     |
|----|-------------------------------------------------------------------------------------------------------------------------------------------------------------------------------------------|-----|
| 72 | Einstellungsprüfung und Freiheit der Religionsausübung. Urteil vom 27.10.1976 (Rs. 130/75 [Prais ./ Rat der Europäischen Gemeinschaften]) .....                                           | 608 |
| 73 | Sozialversicherungsanspruch eines Missionars. Urteil vom 23.10.1986 [Rs. 300/ 84 [Van Roosmalen ./ Bestuur van de Bedrijfsvereniging/Niederlande]) .....                                  | 613 |
| 74 | Beteiligung der Mitglieder einer Religionsgemeinschaft an deren gewerblichen Aktivitäten. Urteil vom 5.10.1988 (Rs. 196/87 [Steymann ./ Staatssekretaris van Justitie/Niederlande]) ..... | 619 |
